# Supplementary material
Source: MDPI journal article supplement (https://www.mdpi.com/2673-6209/3/4/40)
Supplement: s1 [file s1]

Table S1. Relative chemical composition (%) of essential oils from *A. citrodora* and *C. citratus*

| Compounds                                  | KI*  | ACEO | CCEO |
|--------------------------------------------|------|------|------|
| $\alpha$ -thujene                          | 929  | 0.1  |      |
| $\alpha$ -pinene                           | 936  | 0.6  | -    |
| Camphene                                   | 950  | tr   | -    |
| Sabinene                                   | 973  | 1.5  | -    |
| $\beta$ -Pinene                            | 978  | 0.1  | -    |
| Oct-1-en-3-ol                              | 980  | tr   | -    |
| 6-Methylhept-5-en-2-one                    | 986  | 0.6  | 0.6  |
| $\beta$ -Myrcene                           | 989  | 0.2  | 17.1 |
| 2,3-Dehydro-1,8-cineole                    | 990  | -    | tr   |
| (Z)-Hex-3-en-1-ol acetate                  | 1004 | tr   | -    |
| <i>p</i> -Cymene                           | 1024 | 0.1  | -    |
| Limonene                                   | 1030 | 9.9  | 0.3  |
| 1,8-Cineole                                | 1032 | 4.0  | 0.1  |
| $\beta$ - <i>cis</i> -Ocimene              | 1038 | 0.2  | 0.4  |
| $\beta$ - <i>trans</i> -Ocimene            | 1048 | 1.3  | 0.3  |
| $\gamma$ -Terpinene                        | 1060 | tr   | -    |
| <i>cis</i> -Sabinene hydrate               | 1067 | 0.3  | -    |
| $\alpha$ -Terpinolene                      | 1087 | tr   | -    |
| Linalool                                   | 1099 | 1.4  | 1.0  |
| <i>trans</i> - <i>p</i> -Mentha-2,8-dienol | 1128 | 0.1  | -    |
| <i>cis</i> -Limonene oxide                 | 1134 | 0.1  | -    |
| Camphor                                    | 1143 | 0.7  | -    |
| Citronellal                                | 1154 | 0.2  | 0.3  |
| Borneol                                    | 1166 | 0.4  | -    |
| Terpinen-4-ol                              | 1177 | 0.4  | tr   |
| <i>p</i> -Cymen-8-ol                       | 1184 | 1.4  | -    |
| $\alpha$ -Terpineol                        | 1190 | 1.0  | -    |
| <i>trans</i> -carveol                      | 1217 | 0.1  | -    |
| Citronellol                                | 1228 | -    | 0.4  |
| Nerol                                      | 1229 | 1.5  | -    |
| Neral                                      | 1242 | 16.5 | 26.1 |
| Geraniol                                   | 1255 | 1.4  | 2.3  |
| Linalyl acetate                            | 1255 | -    | 2.3  |
| Geranial                                   | 1270 | 21.2 | 36.3 |
| Lavandulyl acetate                         | 1289 | 0.1  | -    |
| Undecan-2-one                              | 1293 | 0.1  | 0.2  |
| Myrtenyl acetate                           | 1329 | 0.3  | 0.1  |
| $\alpha$ -Copaene                          | 1376 | 0.6  | 0.1  |
| Geranyl acetate                            | 1380 | 1.6  | 0.9  |
| $\beta$ -Bourbonene                        | 1384 | 0.5  | 0.1  |
| Methyl eugenol                             | 1402 | 0.1  | -    |
| $\alpha$ -Cedrene                          | 1412 | 0.5  | 0.1  |
| <i>trans</i> -caryophyllene                | 1420 | 4.4  | 1.1  |
| <i>trans</i> - $\alpha$ -Bergamotene       | 1435 | -    | 0.1  |
| $\alpha$ -Humulene                         | 1453 | 0.6  | 0.1  |
| <i>allo</i> -Aromadendrene                 | 1460 | 0.6  | 0.1  |
| Geranyl propanoate                         | 1477 | 0.3  | tr   |
| <i>ar</i> -Curcumene                       | 1482 | 6.0  | 1.2  |
| Bicyclogermacrene                          | 1494 | 0.4  | 0.3  |
| $\beta$ -Bisabolene                        | 1508 | 0.2  | tr   |
| $\gamma$ -Cadinene                         | 1513 | 0.6  | -    |
| $\delta$ -Cadinene                         | 1523 | 0.2  | -    |
| (E)-Nerodiol                               | 1561 | 0.7  | 0.1  |
| Spathunelol                                | 1576 | 2.0  | 0.2  |
| Caryophyllene oxide                        | 1581 | 3.0  | 0.1  |
| Total compounds identified (%)             |      | 88.0 | 97.7 |

\*KI—Kovats index, calculated relative to C7–C25 n-alkanes on the DB-5<sup>MS</sup> column; tr: Compounds present in traces, whose percentage is less than 0.1%.
